# Supplementary material for: An integrative view of storage of low- and high-level visual dimensions in visual short-term memory
Source: Springer Nature journal article supplement (doi:10.1007/s00426-016-0747-4), 2016-02-22
Supplement: MOESM1 [file 7484464]

Appendix I:

Table 1: Mean hit and false alarm rates in Experiment 1.

|  |  |  | Hits | | | False alarms | | |
| --- | --- | --- | --- | --- | --- | --- | --- | --- |
|  |  |  | 800 | 1500 | 2500 | 800 | 1500 | 2500 |
| Shape | Load 2 | Single | 95 | 94 | 97 | 6 | 9 | 5 |
| Either | 99 | 96 | 97 | 7 | 6 | 8 |
| Load 4 | Single | 82 | 89 | 88 | 18 | 21 | 10 |
| Either | 89 | 89 | 94 | 30 | 22 | 11 |
| Scene | Load 2 | Single | 91 | 93 | 95 | 11 | 9 | 5 |
| Either | 95 | 92 | 99 | 3 | 3 | 5 |
| Load 4 | Single | 64 | 75 | 83 | 31 | 27 | 13 |
| Either | 74 | 84 | 88 | 19 | 21 | 9 |

Table 2: Univariate inferential statistics for Experiment 1, presented separately for hits and false alarms.

| Variable | Hits | | | False alarms | | |
| --- | --- | --- | --- | --- | --- | --- |
|  | MSE | F | ηp2 | MSE | F | ηp2 |
| Encoding (E) | 189.89 | 5.26b | 0.242** | 272.77 | 5.58b | 0.253** |
| Dimension (D) | 47.26 | 58.69 a | 0.640*** | 55.88 | 0.02a | 0.001 |
| Load (L) | 57.86 | 182.48 a | 0.847*** | 68.02 | 175.89a | 0.842*** |
| Condition (C) | 42.06 | 29.14 a | 0.469*** | 68.70 | 3.33a | 0.092 |
| E x D | 47.26 | 6.79 b | 0.292** | 55.88 | 0.11b | 0.007 |
| E x L | 57.86 | 10.24 b | 0.383*** | 68.02 | 17.11b | 0.509*** |
| E x C | 42.06 | 1.86 b | 0.101 | 68.70 | 0.76b | 0.044 |
| D x L | 26.92 | 39.91 a | 0.547*** | 30.33 | 3.76a | 0.102 |
| D x C | 58.02 | 1.24 a | 0.036 | 36.13 | 36.79a | 0.527*** |
| L x C | 38.14 | 6.58 a | 0.166* | 51.77 | 0.59a | 0.018 |
| D x L x E | 26.92 | 2.73 b | 0.142 | 30.33 | 0.82b | 0.047 |
| D x C x E | 58.02 | 0.18 b | 0.011 | 36.13 | 7.98b | 0.326*** |
| L x C x E | 38.14 | 0.19 b | 0.011 | 51.77 | 0.96b | 0.055 |
| D x L x C | 28.94 | 2.07 a | 0.059 | 60.40 | 3.07a | 0.085 |
| D x L x C x E | 28.94 | 4.06 b | 0.198* | 60.40 | 1.07b | 0.061 |

a*df* = (1, 33) b*df* = (2, 33)

**p* < 0.05 ***p* < 0.01 ****p* < 0.001

E: Encoding. D: Dimension. L: Load. C: Condition.

Table 3:

Mean hit and false alarm rates in Experiment 2a.

|  |  |  | Hits | | | False alarms | | |
| --- | --- | --- | --- | --- | --- | --- | --- | --- |
|  |  |  | 800 | 1500 | 2500 | 800 | 1500 | 2500 |
| Shape | Load 1 | Single | 98 | 98 | 98 | 3 | 2 | 1 |
| Either | 98 | 98 | 98 | 3 | 6 | 0.60 |
| Load 2 | Single | 97 | 96 | 95 | 9 | 5 | 6 |
| Either | 82 | 92 | 94 | 23 | 16 | 8 |
| Scene | Load 1 | Single | 98 | 96 | 96 | 3 | 3 | 3 |
| Either | 96 | 94 | 98 | 8 | 6 | 1 |
| Load 2 | Single | 95 | 93 | 96 | 15 | 6 | 4 |
| Either | 76 | 87 | 88 | 25 | 15 | 8 |

Table 4:

Mean hits and false alarms rates in Experiment 2b.

|  |  |  | Hits | | False alarms | |
| --- | --- | --- | --- | --- | --- | --- |
|  |  |  | 1500 | 2500 | 1500 | 2500 |
| Shape | Load 1 | Single | 99 | 99 | 2 | 0.40 |
| Either | 99 | 98 | 1 | 1 |
| Load 2 | Single | 97 | 97 | 2 | 5 |
| Either | 87 | 88 | 13 | 14 |
| Scene | Load 1 | Single | 99 | 97 | 2 | 2 |
| Either | 91 | 95 | 4 | 4 |
| Load 2 | Single | 93 | 95 | 7 | 6 |
| Either | 86 | 85 | 17 | 17 |

Table 5:

Univariate inferential statistics for Experiments 2a and 2b, presented separately for hits and false alarms.

|  | Variable | Hits | | | False alarms | | |
| --- | --- | --- | --- | --- | --- | --- | --- |
|  |  | MSE | F | ηp2 | MSE | F | ηp2 |
| Experiment 2A | Encoding (E) | 80.19 | 1.40b | 0.078 | 128.97 | 4.63b | 0.219* |
| Dimension (D) | 53.82 | 8.21a | 0.199** | 49.32 | 2.14a | 0.061 |
| Load (L) | 50.58 | 55.19 a | 0.626*** | 69.07 | 72.66a | 0.688*** |
| Condition (C) | 27.09 | 57.56 a | 0.636*** | 61.31 | 29.57a | 0.473*** |
| E x D | 53.82 | 0.41 b | 0.024 | 49.32 | 1.34b | 0.075 |
| E x L | 50.58 | 5.45 b | 0.248** | 69.07 | 7.23b | 0.305** |
| E x C | 27.09 | 13.72 b | 0.454*** | 61.31 | 5.59b | 0.253** |
| D x L | 51.29 | 1.52 a | 0.044 | 46.97 | 0a | 0 |
| D x C | 40.04 | 3.13 a | 0.087 | 39.18 | 0.01a | 0 |
| L x C | 26.31 | 53.49 a | 0.618*** | 60.38 | 11.95a | 0.266** |
| D x L x E | 51.29 | 0.08 b | 0.005 | 46.97 | 0.46b | 0.027 |
| D x C x E | 40.04 | 0.06 b | 0.003 | 39.18 | 0.03b | 0.002 |
| L x C x E | 26.31 | 9.99 b | 0.377*** | 60.38 | 0.66b | 0.039 |
| D x L x C | 43.28 | 1.97 a | 0.056 | 20.09 | 1.07a | 0.032 |
| D x L x C x E | 43.28 | 0.88b | 0.051 | 20.09 | 1.81b | 0.099 |
| Experiment 2B | Encoding (E) | 129.76 | 0.03c | 0.002 | 103.59 | 0.005c | 0 |
| Dimension (D) | 114.47 | 3.33c | 0.131 | 61.99 | 4.84c | 0.180* |
| Load (L) | 75.43 | 25.36c | 0.535*** | 57.29 | 52.09c | 0.703*** |
| Condition (C) | 75.76 | 21.07c | 0.489*** | 40.57 | 39.91c | 0.645*** |
| E x D | 114.47 | 0.06c | 0.003 | 61.99 | 0.02c | 0.001 |
| E x L | 75.43 | 0.002c | 0 | 57.29 | 0.24c | 0.011 |
| E x C | 75.76 | 0.094c | 0.004 | 40.57 | 0.04c | 0.002 |
| D x L | 71.37 | 0.18c | 0.008 | 40.38 | 0.57c | 0.025 |
| D x C | 85.66 | 0.55c | 0.024 | 54.21 | 0.42c | 0.019 |
| L x C | 60.71 | 7.62c | 0.257* | 39.62 | 26.51c | 0.546*** |
| D x L x E | 71.37 | 0.32c | 0.014 | 40.38 | 0.44c | 0.020 |
| D x C x E | 85.66 | 0.05c | 0.002 | 54.21 | 0.008c | 0 |
| L x C x E | 60.71 | 0.40c | 0.018 | 39.62 | 0.08c | 0.003 |
| D x L x C | 61.40 | 0.98c | 0.043 | 33.86 | 0.12c | 0.005 |
| D x L x C x E | 61.40 | 1.31c | 0.056 | 33.86 | 0.42c | 0.019 |

a *df* = (1, 33) b *df* = (2, 33) c *df*= (1, 22)

**p* < 0.05 ***p* < 0.01 ****p* < 0.001

E: Encoding. D: Dimension. L: Load. C: Condition.

Table 6:

|  |  |  | Hits | | | False alarms | | |
| --- | --- | --- | --- | --- | --- | --- | --- | --- |
|  |  |  | 800 | 1500 | 2500 | 800 | 1500 | 2500 |
| Color | Load 2 | Single | 100 | 99 | 99 | 3 | 3 | 3 |
| Either | 96 | 96 | 99 | 10 | 8 | 4 |
| Load 3 | Single | 96 | 99 | 97 | 6 | 6 | 2 |
| Either | 97 | 94 | 90 | 13 | 14 | 18 |
| Load 4 | Single | 95 | 90 | 99 | 9 | 10 | 8 |
| Either | 92 | 88 | 90 | 25 | 19 | 22 |
| Object | Load 2 | Single | 90 | 92 | 97 | 14 | 13 | 8 |
| Either | 83 | 83 | 88 | 22 | 13 | 22 |
| Load 3 | Single | 72 | 81 | 87 | 19 | 15 | 12 |
| Either | 64 | 74 | 69 | 21 | 24 | 15 |
| Load 4 | Single | 55 | 68 | 81 | 23 | 27 | 18 |
| Either | 46 | 60 | 68 | 25 | 17 | 36 |
| Conjunction | Load 2 | | 77 | 71 | 85 | 11 | 9 | 7 |
| Load 3 | | 65 | 69 | 67 | 25 | 28 | 22 |
| Load 4 | | 69 | 62 | 65 | 35 | 43 | 26 |

Mean hit and false alarm rates in Experiment 3.

Table7:

Mean of hit and false alarm rates in Experiment 4.

|  |  |  | Hits | | | False alarms | | |
| --- | --- | --- | --- | --- | --- | --- | --- | --- |
|  |  |  | 800 | 1500 | 2500 | 800 | 1500 | 2500 |
| Color | Load 2 | Single | 97 | 99 | 99 | 2 | 4 | 6 |
| Either | 92 | 94 | 94 | 1 | 3 | 6 |
| Load 3 | Single | 95 | 98 | 100 | 7 | 5 | 13 |
| Either | 94 | 92 | 93 | 8 | 15 | 17 |
| Load 3 | Single | 97 | 94 | 96 | 11 | 8 | 17 |
| Either | 88 | 93 | 89 | 19 | 19 | 22 |
| Object | Load 2 | Single | 85 | 92 | 94 | 9 | 3 | 12 |
| Either | 82 | 83 | 92 | 17 | 24 | 14 |
| Load 3 | Single | 78 | 83 | 88 | 15 | 10 | 11 |
| Either | 71 | 72 | 75 | 33 | 19 | 14 |
| Load 4 | Single | 69 | 67 | 72 | 19 | 9 | 16 |
| Either | 58 | 49 | 63 | 31 | 18 | 22 |
| Conjunction | Load 2 | | 88 | 85 | 90 | 7 | 5 | 8 |
| Load 3 | | 75 | 84 | 74 | 21 | 19 | 21 |
| Load 4 | | 66 | 76 | 67 | 30 | 34 | 32 |

Table 8:

Univariate inferential statistics for Experiments 3 and 4, presented separately for hits and false alarms.

|  | Variable | Hits | | | False alarms | | |
| --- | --- | --- | --- | --- | --- | --- | --- |
|  |  | MSE | F | ηp2 | MSE | F | ηp2 |
| Experiment 3 | Encoding (E) | 146.15 | 1.97a | 0.107 | 116.24 | 0.53a | 0.031 |
| Load (L) | 128.40 | 80.51b | 0.709*** | 176.19 | 42.41b | 0.562*** |
| Condition (C) | 257.02 | 67.20d | 0.671*** | 214.48 | 23.74d | 0.418*** |
| E x L | 128.40 | 3.03c | 0.155* | 176.19 | 0.40c | 0.023 |
| E x C | 257.02 | 2.28e | 0.121* | 214.48 | 1.61e | 0.089 |
| L x C | 148.73 | 6.73f | 0.169*** | 172.94 | 3.63f | 0.099*** |
| L x C x E | 148.73 | 1.32g | 0.074 | 172.94 | 1.40g | 0.078 |
| ShS vs. ShE | 505.18h | 20.53h | 0.384*** | 278.63 | 10.36h | 0.239** |
| ShS vs. CoS | 306.41h | 97.91h | 0.748*** | 250.16 | 51.10h | 0.608*** |
| ShS vs. Conj | 660.63h | 18.00h | 0.353*** | 464.36 | 9.54h | 0.224** |
| Experiment 4 | Encoding (E) | 64.16 | 1.69a | 0.093 | 214.31 | 0.27a | 0.016 |
| Load (L) | 119.52 | 84.07b | 0.718*** | 175.92 | 40.87b | 0.553*** |
| Condition (C) | 217.80 | 54.20d | 0.622*** | 208.84 | 16.14d | 0.328*** |
| E x L | 119.52 | 0.60c | 0.035 | 175.92 | 0.67c | 0.039 |
| E x C | 217.80 | 1.18e | 0.067 | 208.84 | 2.12e | 0.114* |
| L x C | 132.12 | 9.03f | 0.215*** | 144.89 | 4.54f | 0.121*** |
| L x C x E | 132.12 | 0.97g | 0.055 | 144.89 | 1.03g | 0.059 |
| ShS vs. ShE | 452.01 | 20.61h | 0.384*** | 468.60 | 22.19h | 0.402*** |
| ShS vs. CoS | 202.89 | 142.55h | 0.812*** | 188.15 | 5.96h | 0.153* |
| ShS vs. Conj | 364.58 | 1.95h | 0.056 | 436.15 | 16.32h | 0.331*** |

a*df* = (2, 33) b*df* = (2,66) c*df* = (4,66) d*df* = (4,132) e*df* = (8,132) f*df* = (8,264) g*df* = (16,264)

h*df* = (1,33)

**p* < 0.05 ***p* < 0.01 ****p* < 0.001

E: Encoding. D: Dimension. L: Load. C: Condition.

ShS: Shape single. ShE: Shape either. CoS: Color single. Conj: Conjunction.

**Post-hoc tests:**

**Experiment 3:** Additional post-hoc tests on hit rates using the Bonferroni correction for multiple comparisons revealed a non-significant difference between the color single and color either conditions (*p* = 0.17), and a significant difference between the shape either and the color either conditions (*p* < 0.0001). Post-hoc tests on false alarm rates demonstrated a significant difference between the color single and color either conditions (*p* < 0.0001) and a marginally significant difference between the shape either and the color either conditions (*p* = 0.053).

**Experiment 4:** Conducting additional post-hoc tests using the Bonferroni correction for multiple comparisons on the hit rates showed a significant difference between the color single and color either conditions (*p* < 0.05), and a significant difference between the shape either and the color either conditions (*p* < 0.0001). For the false alarms, the difference between the color single and color either conditions was not significant (*p* = 0.229), whereas the difference between the shape either and the color either conditions was significant (*p* < 0.01).
